# Supplementary material for: Effect of Different Immersion Tank Water Temperatures on the Microbiological Quality of Rabbit Carcasses
Source: MDPI journal article supplement (doi:10.3390/agriculture13020270), 2023-01-22
Supplement: s1 [file s1]

**It is suggested to design 1 table with the results of the analysis of variance, and 1 table with the least-square adjusted means and their comparison.**

Table S1. Effect of the temperature of the carcasses on the microbiological count MES.

| Type III Tests of Fixed Effects |        |        |         |        |
|---------------------------------|--------|--------|---------|--------|
| Effect                          | Num DF | Den DF | F Value | Pr > F |
| TEMP                            | 2      | 24     | 3.70    | 0.0397 |
| TRAT                            | 1      | 24     | 4.70    | 0.0404 |
| TEMP*TRAT                       | 2      | 24     | 5.55    | 0.0104 |

Table S2. Effect of the temperature of the carcasses on the microbiological count EC.

| Type III Tests of Fixed Effects |        |        |         |        |
|---------------------------------|--------|--------|---------|--------|
| Effect                          | Num DF | Den DF | F Value | Pr > F |
| TEMP                            | 2      | 24     | 0.86    | 0.4361 |
| TRAT                            | 1      | 24     | 5.07    | 0.0337 |
| TEMP*TRAT                       | 2      | 24     | 0.35    | 0.7102 |

Table S3. Effect of the temperature of the carcasses on the microbiological count CPS.

| Type III Tests of Fixed Effects |        |        |         |        |
|---------------------------------|--------|--------|---------|--------|
| Effect                          | Num DF | Den DF | F Value | Pr > F |
| TEMP                            | 2      | 24     | 0.97    | 0.3918 |
| TRAT                            | 1      | 24     | 2.69    | 0.1139 |
| TEMP*TRAT                       | 2      | 24     | 0.17    | 0.8465 |
